# Supplementary material for: Hepatoprotective effects of sea cucumber ether-phospholipids against alcohol-induced lipid metabolic dysregulation and oxidative stress in mice
Source: Royal Society of Chemistry journal article supplement (doi:10.1039/d1fo03833h), 2022-01-01
Supplement: d1fo03833h1.pdf [file d1fo03833h1.pdf]

**Table S1** Fatty acid composition of plasmemyl phosphatidylethanolamine and plasmemyl phosphatidylcholine of sea cucumber *Cucumaria frondosa*.

| Molecular species | Relative content (%) | Molecular species | Relative content (%) |
|-------------------|----------------------|-------------------|----------------------|
| PC(O-16:0/15:0)   | 1.99±0.23            | PE(P-18:0/17:0)   | 0.12±0.03            |
| PC(O-16:1/17:1)   | 0.17±0.02            | PE(P-16:0/20:5)   | 0.12±0.02            |
| PC(O-16:0/17:0)   | 10.45±0.24           | PE(P-18:0/18:1)   | 0.23±0.10            |
| PC(O-18:0/16:1)   | 0.33±0.04            | PE(P-18:0/18:0)   | 5.01±0.43            |
| PC(O-15:0/20:5)   | 0.33±0.02            | PE(P-17:0/20:5)   | 0.23±0.13            |
| PC(O-15:0/20:4)   | 0.17±0.03            | PE(P-18:0/19:1)   | 0.12±0.02            |
| PC(O-18:0/17:2)   | 0.17±0.02            | PE(P-18:0/19:0)   | 0.47±0.07            |
| PC(O-17:0/18:1)   | 0.66±0.02            | PE(P-18:1/20:5)   | 0.12±0.01            |
| PC(O-16:1/20:5)   | 0.66±0.19            | PE(P-18:0/20:5)   | 69.35±0.21           |
| PC(O-16:0/20:5)   | 9.29±0.42            | PE(P-18:0/20:4)   | 13.87±0.42           |
| PC(O-16:0/20:4)   | 1.16±0.23            | PE(P-18:0/20:2)   | 0.12±0.07            |
| PC(O-16:0/20:3)   | 0.17±0.01            | PE(P-18:0/20:1)   | 0.47±0.09            |
| PC(O-16:0/20:2)   | 0.17±0.01            | PE(P-18:0/20:0)   | 1.52±0.30            |
| PC(O-17:1/20:5)   | 0.33±0.11            | PE(P-19:1/20:5)   | 0.12±0.02            |
| PC(O-17:0/20:5)   | 2.82±0.27            | PE(P-19:2/20:4)   | 0.12±0.02            |
| PC(O-17:0/20:4)   | 0.50±0.01            | PE(P-19:0/20:5)   | 2.91±0.14            |
| PC(O-18:2/20:5)   | 0.33±0.04            | PE(P-19:1/20:4)   | 0.23±0.02            |
| PC(O-18:1/20:5)   | 36.48±0.14           | PE(P-19:0/20:4)   | 1.05±0.31            |
| PC(O-18:0/20:5)   | 21.56±0.11           | PE(P-19:0/20:3)   | 0.12±0.03            |
| PC(O-18:0/20:4)   | 1.99±0.022           | PE(P-18:0/21:1)   | 0.23±0.10            |
| PC(O-18:1/20:2)   | 0.17±0.04            | PE(P-20:2/20:5)   | 0.12±0.01            |
| PC(O-19:2/20:5)   | 0.17±0.01            | PE(P-19:0/20:0)   | 0.12±0.01            |
| PC(O-19:2/20:5)   | 0.17±0.01            | PE(P-20:1/20:5)   | 0.47±0.23            |
| PC(O-19:1/20:5)   | 0.50±0.02            | PE(P-20:0/20:5)   | 0.23±0.04            |
| PC(O-19:0/20:5)   | 1.99±0.08            | PE(P-20:1/20:4)   | 1.05±0.18            |
| PC(O-19:0/20:4)   | 0.33±0.01            | PE(P-20:0/20:4)   | 0.47±0.02            |
| PC(O-20:3/20:5)   | 0.33±0.01            | PE(P-19:0/22:5)   | 0.12±0.09            |
| PC(O-18:1/22:6)   | 0.50±0.03            | PE(P-18:0/23:1)   | 0.35±0.06            |
| PC(O-20:1/20:5)   | 4.15±0.11            | PE(P-19:0/22:1)   | 0.12±0.06            |
| PC(O-20:0/20:5)   | 1.66±0.23            | PE(P-18:0/25:1)   | 0.23±0.08            |
| PC(O-20:0/20:4)   | 0.17±0.00            | PE(P-24:0/20:4)   | 0.23±0.13            |
| PC(O-18:1/20:5)   | 0.17±0.01            | -                 | -                    |
